# Supplementary material for: Acetazolamide modulates intracranial pressure directly by its action on the cerebrospinal fluid secretion apparatus
Source: Springer Nature journal article supplement (doi:10.1186/s12987-022-00348-6), 2022-06-29
Supplement: MOESM1 [file 23219990]

|                                | CONTROL  |       |   |         |       |   |         |       |   | ACETAZOLAMIDE |       |   |         |       |   |         |       |   | 2way ANOVA p-value |           |
|--------------------------------|----------|-------|---|---------|-------|---|---------|-------|---|---------------|-------|---|---------|-------|---|---------|-------|---|--------------------|-----------|
|                                | Baseline |       |   | 1h      |       |   | 2h      |       |   | Baseline      |       |   | 1h      |       |   | 2h      |       |   | Time               | Treatment |
|                                | Average  | SD    | n | Average | SD    | n | Average | SD    | n | Average       | SD    | n | Average | SD    | n | Average | SD    | n |                    |           |
| pH                             | 7.393    | 0.020 | 5 | 7.359   | 0.019 | 5 | 7.337   | 0.031 | 5 | 7.379         | 0.024 | 5 | 7.156   | 0.027 | 5 | 7.126   | 0.019 | 5 | <.001              | <.001     |
| pCO <sub>2</sub>               | 5.26     | 0.31  | 5 | 5.15    | 0.27  | 5 | 5.38    | 0.30  | 5 | 5.21          | 0.35  | 5 | 9.40    | 0.34  | 5 | 10.05   | 0.40  | 5 | <.001              | <.001     |
| pO <sub>2</sub>                | 13.8     | 1.1   | 5 | 13.8    | 1.3   | 5 | 14.0    | 1.4   | 5 | 14.4          | 3.0   | 5 | 15.5    | 1.8   | 5 | 14.5    | 1.4   | 5 | 0.215              | 0.402     |
| ctHb                           | 9.5      | 0.3   | 5 | 9.2     | 0.4   | 5 | 9.6     | 0.3   | 5 | 9.3           | 0.4   | 5 | 9.2     | 0.4   | 5 | 9.5     | 0.7   | 5 | 0.033              | 0.729     |
| sO <sub>2</sub>                | 94.2     | 1.7   | 5 | 94.7    | 3.7   | 5 | 93.3    | 2.2   | 5 | 94.3          | 2.9   | 4 | 90.2    | 3.1   | 5 | 88.6    | 3.0   | 5 | <.001              | 0.151     |
| FO <sub>2</sub> Hb             | 94.5     | 1.8   | 5 | 94.1    | 2.7   | 5 | 93.3    | 2.4   | 5 | 95.3          | 4.1   | 5 | 90.1    | 3.3   | 5 | 88.5    | 3.2   | 5 | <.001              | 0.181     |
| K <sup>+</sup>                 | 5.2      | 0.2   | 5 | 4.9     | 0.2   | 5 | 5.0     | 0.3   | 5 | 5.4           | 0.4   | 5 | 5.1     | 0.4   | 5 | 5.9     | 0.6   | 5 | 0.038              | 0.043     |
| Na <sup>+</sup>                | 139      | 1.3   | 5 | 142     | 1.6   | 5 | 144     | 2.4   | 5 | 138           | 1.7   | 5 | 143     | 2.2   | 5 | 144     | 2.9   | 5 | <.001              | 0.77      |
| Ca <sup>2+</sup>               | 0.87     | 0.05  | 5 | 0.84    | 0.03  | 5 | 0.85    | 0.05  | 5 | 0.79          | 0.17  | 5 | 0.78    | 0.14  | 5 | 0.82    | 0.09  | 5 | 0.28               | 0.389     |
| Cl <sup>-</sup>                | 102      | 1.6   | 5 | 107     | 2.0   | 5 | 110     | 1.1   | 5 | 101           | 2.1   | 5 | 105     | 1.5   | 5 | 106     | 1.6   | 5 | <.001              | 0.047     |
| cGlu                           | 22.6     | 1.7   | 5 | 18.4    | 2.6   | 5 | 11.9    | 2.2   | 5 | 24.5          | 1.4   | 5 | 19.5    | 1.9   | 5 | 14.4    | 2.0   | 5 | <.001              | 0.09      |
| cLac                           | 1.2      | 0.4   | 5 | 1.6     | 0.4   | 5 | 2.0     | 0.5   | 5 | 1.1           | 0.3   | 5 | 0.8     | 0.2   | 5 | 0.9     | 0.2   | 5 | 0.223              | <.001     |
| ctBil                          | 53       | 5.9   | 5 | 48      | 4.0   | 4 | 54      | 8.6   | 5 | 50            | 2.6   | 3 | 39      | 2.6   | 3 | 42      | 3.1   | 3 | 0.001              | 0.09      |
| cBase                          | -0.9     | 1.1   | 5 | -3.7    | 1.2   | 5 | -4.2    | 1.6   | 5 | -2.2          | 1.3   | 5 | -3.9    | 1.3   | 5 | -4.4    | 1.2   | 5 | <.001              | 0.482     |
| cHCO <sub>3</sub> <sup>-</sup> | 23.7     | 0.8   | 5 | 21.6    | 0.9   | 5 | 21.1    | 1.3   | 5 | 23.0          | 0.9   | 4 | 19.6    | 1.1   | 4 | 19.3    | 0.7   | 4 | <.001              | 0.04      |

**Supplementary Table S1** Blood gas analysis in intact animals before (baseline) and after (at 1 and 2 h) i.v. injection of 100 mg kg<sup>-1</sup> AZE or control solution in anesthetized and ventilated rats.

|                                | CONTROL NEPHRECTOMY |       |   |         |       |   |         |       |   | ACETAZOLAMIDE NEPHRECTOMY |       |   |         |       |   |         |       |   | 2way ANOVA p-value |           |
|--------------------------------|---------------------|-------|---|---------|-------|---|---------|-------|---|---------------------------|-------|---|---------|-------|---|---------|-------|---|--------------------|-----------|
|                                | Baseline            |       |   | 1h      |       |   | 2h      |       |   | Baseline                  |       |   | 1h      |       |   | 2h      |       |   | Time               | Treatment |
|                                | Average             | SD    | n | Average | SD    | n | Average | SD    | n | Average                   | SD    | n | Average | SD    | n | Average | SD    | n |                    |           |
| pH                             | 7.343               | 0.031 | 4 | 7.295   | 0.039 | 4 | 7.264   | 0.024 | 4 | 7.368                     | 0.036 | 4 | 7.148   | 0.027 | 4 | 7.100   | 0.035 | 4 | <.001              | 0.005     |
| pCO <sub>2</sub>               | 5.34                | 0.34  | 4 | 4.78    | 0.52  | 4 | 5.41    | 0.19  | 4 | 4.99                      | 0.16  | 4 | 9.08    | 0.42  | 4 | 10.16   | 0.58  | 4 | <.001              | <.001     |
| pO <sub>2</sub>                | 16.4                | 1.2   | 4 | 16.4    | 1.4   | 4 | 14.5    | 3.4   | 4 | 16.3                      | 3.1   | 4 | 17.1    | 1.4   | 4 | 16.5    | 2.1   | 4 | 0.303              | 0.539     |
| ctHb                           | 9.4                 | 0.2   | 3 | 9.0     | 0.4   | 4 | 9.0     | 0.3   | 4 | 9.6                       | 1.0   | 4 | 9.2     | 0.7   | 4 | 8.7     | 0.4   | 4 | 0.136              | 0.761     |
| sO <sub>2</sub>                | 97.2                | 3.9   | 3 | 96.3    | 3.7   | 4 | 93.0    | 6.9   | 4 | 96.4                      | 4.0   | 4 | 94.5    | 2.6   | 4 | 91.2    | 2.6   | 4 | 0.033              | 0.719     |
| FO <sub>2</sub> Hb             | 96.9                | 3.0   | 3 | 95.6    | 2.3   | 4 | 92.2    | 5.9   | 4 | 95.7                      | 2.9   | 4 | 94.8    | 3.1   | 4 | 91.9    | 1.9   | 3 | 0.059              | 0.819     |
| K <sup>+</sup>                 | 5.8                 | 0.8   | 4 | 5.1     | 0.2   | 4 | 6.0     | 0.4   | 4 | 5.6                       | 0.1   | 4 | 5.7     | 0.3   | 4 | 6.2     | 0.4   | 4 | 0.025              | 0.382     |
| Na <sup>+</sup>                | 138                 | 1.5   | 4 | 143     | 1.3   | 4 | 144     | 0.8   | 4 | 139                       | 2.2   | 4 | 143     | 0.5   | 4 | 145     | 0.8   | 4 | <.001              | 0.072     |
| Ca <sup>2+</sup>               | 0.84                | 0.11  | 4 | 0.82    | 0.08  | 4 | 0.85    | 0.12  | 4 | 0.84                      | 0.04  | 4 | 0.71    | 0.10  | 4 | 0.77    | 0.10  | 4 | 0.033              | 0.321     |
| Cl <sup>-</sup>                | 102                 | 3.7   | 4 | 108     | 1.7   | 4 | 109     | 1.5   | 4 | 102                       | 1.0   | 4 | 105     | 1.9   | 4 | 106     | 1.9   | 4 | <.001              | 0.062     |
| cGlu                           | 24.3                | 5.6   | 4 | 14.7    | 3.3   | 4 | 11.0    | 2.6   | 4 | 24.8                      | 3.2   | 4 | 20.4    | 3.3   | 4 | 14.8    | 1.9   | 4 | <.001              | 0.132     |
| cLac                           | 1.4                 | 0.4   | 4 | 1.9     | 0.2   | 4 | 1.9     | 0.5   | 4 | 1.0                       | 0.2   | 4 | 0.7     | 0.2   | 4 | 0.8     | 0.2   | 4 | 0.344              | 0.003     |
| ctBil                          | 54                  | 2.8   | 2 | 45      | 0.6   | 3 | 41      | 5.8   | 3 | 56                        | 11.4  | 3 | 42      | 6.4   | 2 | 40      | 2.1   | 2 |                    |           |
| cBase                          | -4.0                | 1.3   | 4 | -9.2    | 1.3   | 4 | -8.7    | 1.4   | 4 | -3.8                      | 2.1   | 4 | -5.3    | 0.9   | 4 | -6.1    | 1.5   | 4 | <.001              | 0.043     |
| cHCO <sub>3</sub> <sup>-</sup> | 21.4                | 1.0   | 4 | 17.8    | 1.0   | 4 | 17.8    | 1.0   | 4 | 21.7                      | 1.7   | 4 | 19.0    | 0.8   | 4 | 18.2    | 1.1   | 4 | <.001              | 0.424     |

**Supplementary Table S2** Blood gas analysis before (baseline) and after (at 1 and 2 h) i.v. injection of 100 mg kg<sup>-1</sup> AZE or control solution in anesthetized, ventilated and nephrectomized rats

|                                | CONTROL HYPERVENTILATION |       |   |         |       |   |         |       |   | ACETAZOLAMIDE HYPERVENTILATION |       |   |         |       |   |         |       |   | 2way ANOVA p-value |           |
|--------------------------------|--------------------------|-------|---|---------|-------|---|---------|-------|---|--------------------------------|-------|---|---------|-------|---|---------|-------|---|--------------------|-----------|
|                                | Baseline                 |       |   | 1h      |       |   | 2h      |       |   | Baseline                       |       |   | 1h      |       |   | 2h      |       |   | Time               | Treatment |
|                                | Average                  | SD    | n | Average | SD    | n | Average | SD    | n | Average                        | SD    | n | Average | SD    | n | Average | SD    | n |                    |           |
| pH                             | 7.434                    | 0.021 | 4 | 7.585   | 0.050 | 4 | 7.525   | 0.083 | 4 | 7.425                          | 0.023 | 4 | 7.216   | 0.036 | 4 | 7.150   | 0.050 | 4 | 0.001              | <.001     |
| pCO <sub>2</sub>               | 4.77                     | 0.22  | 4 | 2.04    | 0.12  | 4 | 1.92    | 0.10  | 4 | 4.84                           | 0.19  | 4 | 7.80    | 0.29  | 4 | 8.37    | 0.65  | 4 | 0.039              | <.001     |
| pO <sub>2</sub>                | 14.4                     | 2.4   | 4 | 22.8    | 0.6   | 4 | 22.8    | 0.6   | 4 | 13.8                           | 1.1   | 4 | 23.0    | 0.5   | 4 | 23.1    | 0.7   | 4 | <.001              | 0.931     |
| ctHb                           | 9.3                      | 0.3   | 4 | 9.3     | 0.7   | 4 | 9.8     | 0.7   | 4 | 9.8                            | 0.4   | 4 | 9.7     | 0.4   | 4 | 10.4    | 0.5   | 4 | 0.022              | 0.128     |
| sO <sub>2</sub>                | 95.3                     | 1.4   | 4 | NA      |       |   | NA      |       |   | 95.6                           | 3.2   | 4 | 97.7    | 2.4   | 4 | 97.3    | 2.7   | 4 |                    |           |
| FO <sub>2</sub> Hb             | 95.5                     | 1.4   | 4 | NA      |       |   | NA      |       |   | 95.0                           | 2.0   | 4 | 97.4    | 1.3   | 4 | 97.2    | 1.6   | 4 |                    |           |
| K <sup>+</sup>                 | 5.2                      | 0.2   | 4 | 5.2     | 0.2   | 4 | 4.9     | 0.2   | 4 | 5.4                            | 0.5   | 4 | 5.8     | 0.5   | 4 | 6.2     | 0.4   | 4 | 0.185              | 0.009     |
| Na <sup>+</sup>                | 139                      | 1.7   | 4 | 140     | 1.0   | 4 | 142     | 3.5   | 4 | 139                            | 0.0   | 4 | 142     | 0.8   | 4 | 143     | 1.6   | 4 | 0.007              | 0.326     |
| Ca <sup>2+</sup>               | 0.92                     | 0.04  | 4 | 0.88    | 0.03  | 4 | 0.86    | 0.07  | 4 | 0.87                           | 0.05  | 4 | 0.86    | 0.01  | 4 | 0.82    | 0.03  | 4 | 0.094              | 0.056     |
| Cl <sup>-</sup>                | 102                      | 2.2   | 4 | 106     | 2.2   | 4 | 110     | 3.2   | 4 | 102                            | 1.0   | 4 | 105     | 1.7   | 4 | 108     | 1.3   | 4 | <.001              | 0.377     |
| cGlu                           | 19.5                     | 2.9   | 4 | 21.7    | 3.1   | 4 | 16.0    | 3.7   | 4 | 22.7                           | 2.1   | 4 | 21.9    | 3.9   | 4 | 19.5    | 4.4   | 4 | 0.001              | 0.352     |
| cLac                           | 1.1                      | 0.2   | 4 | 4.2     | 1.0   | 4 | 4.6     | 0.7   | 4 | 1.1                            | 0.2   | 4 | 0.8     | 0.2   | 4 | 1.0     | 0.2   | 4 | <.001              | <.001     |
| ctBil                          | 51                       | 3.1   | 4 | NA      |       |   | NA      |       |   | 53                             | 7.2   | 3 | 53      | 8.5   | 2 | 63      | 5.7   | 2 |                    |           |
| cBase                          | -0.3                     | 2.4   | 4 | -7.3    | 2.5   | 4 | -10.8   | 3.6   | 4 | -0.7                           | 1.1   | 4 | -4.1    | 1.7   | 4 | -7.1    | 1.7   | 4 | <.001              | 0.205     |
| cHCO <sub>3</sub> <sup>-</sup> | 24.5                     | 1.8   | 4 | NA      |       |   | NA      |       |   | 24.1                           | 0.9   | 4 | 20.3    | 1.3   | 4 | 17.9    | 1.4   | 4 |                    |           |

**Supplementary Table S3** Blood gas analysis before (baseline) and after (at 1 and 2 h) i.v. injection of 100 mg kg<sup>-1</sup> AZE or control solution in anesthetized and hyperventilated rats. NA – the values were over the detection threshold.

|                                | CONTROL INTRAVENTRICULAR |       |   |         |       |   |         |       |   | ACETAZOLAMIDE INTRAVENTRICULAR |       |   |         |       |   |         |       |   | 2way ANOVA p-value |           |
|--------------------------------|--------------------------|-------|---|---------|-------|---|---------|-------|---|--------------------------------|-------|---|---------|-------|---|---------|-------|---|--------------------|-----------|
|                                | Baseline                 |       |   | 1h      |       |   | 2h      |       |   | Baseline                       |       |   | 1h      |       |   | 2h      |       |   | Time               | Treatment |
|                                | Average                  | SD    | n | Average | SD    | n | Average | SD    | n | Average                        | SD    | n | Average | SD    | n | Average | SD    | n |                    |           |
| pH                             | 7.409                    | 0.029 | 4 | 7.367   | 0.034 | 4 | 7.357   | 0.041 | 4 | 7.421                          | 0.019 | 4 | 7.387   | 0.005 | 4 | 7.358   | 0.014 | 4 | <.001              | 0.526     |
| pCO <sub>2</sub>               | 4.76                     | 0.36  | 4 | 4.47    | 0.25  | 4 | 4.76    | 0.29  | 4 | 4.77                           | 0.15  | 4 | 4.70    | 0.30  | 4 | 4.78    | 0.20  | 4 | 0.23               | 0.551     |
| pO <sub>2</sub>                | 16.3                     | 3.3   | 4 | 15.8    | 1.4   | 4 | 14.9    | 1.3   | 4 | 15.2                           | 2.7   | 4 | 14.9    | 1.9   | 4 | 15.0    | 1.7   | 4 | 0.388              | 0.649     |
| ctHb                           | 9.3                      | 0.5   | 4 | 9.5     | 0.5   | 4 | 9.6     | 0.5   | 4 | 9.5                            | 0.6   | 4 | 9.9     | 0.3   | 4 | 9.9     | 0.3   | 4 | 0.167              | 0.289     |
| sO <sub>2</sub>                | 95.6                     | 1.4   | 4 | 95.2    | 1.0   | 4 | 94.4    | 2.2   | 4 | 95.0                           | 1.9   | 4 | 94.0    | 1.6   | 4 | 93.9    | 1.4   | 4 | 0.089              | 0.487     |
| FO <sub>2</sub> Hb             | 96.0                     | 1.5   | 4 | 95.3    | 1.1   | 4 | 94.6    | 2.2   | 4 | 95.1                           | 2.1   | 4 | 94.2    | 1.6   | 4 | 94.1    | 1.4   | 4 | 0.074              | 0.487     |
| K <sup>+</sup>                 | 5.2                      | 0.4   | 4 | 4.8     | 0.5   | 4 | 5.0     | 0.4   | 4 | 5.2                            | 0.2   | 4 | 5.0     | 0.3   | 4 | 5.2     | 0.7   | 4 | 0.263              | 0.582     |
| Na <sup>+</sup>                | 140                      | 0.5   | 4 | 144     | 2.1   | 4 | 144     | 0.8   | 4 | 141                            | 2.1   | 4 | 143     | 2.2   | 4 | 145     | 0.0   | 4 | 0.007              | 0.55      |
| Ca <sup>2+</sup>               | 0.88                     | 0.11  | 4 | 0.85    | 0.08  | 4 | 0.85    | 0.06  | 4 | 0.89                           | 0.05  | 4 | 0.86    | 0.06  | 4 | 0.86    | 0.06  | 4 | 0.081              | 0.895     |
| Cl <sup>-</sup>                | 104                      | 3.7   | 4 | 110     | 3.1   | 4 | 108     | 4.7   | 4 | 101                            | 2.5   | 4 | 106     | 1.3   | 4 | 109     | 3.4   | 4 | 0.024              | 0.204     |
| cGlu                           | 19.8                     | 2.6   | 4 | 13.1    | 1.2   | 4 | 8.4     | 1.6   | 4 | 21.4                           | 3.4   | 4 | 17.5    | 2.2   | 4 | 9.9     | 0.8   | 4 | <.001              | 0.081     |
| cLac                           | 1.5                      | 0.2   | 4 | 2.3     | 0.5   | 4 | 1.9     | 0.4   | 4 | 1.1                            | 0.2   | 4 | 1.9     | 0.4   | 4 | 2.0     | 0.3   | 4 | 0.001              | 0.313     |
| ctBil                          | 51                       | 5.1   | 4 | 51      | 5.5   | 4 | 55      | 3.8   | 4 | 52                             | 6.1   | 4 | 57      | 3.7   | 4 | 59      | 3.6   | 4 | <.001              | 0.284     |
| cBase                          | -2.1                     | 3.4   | 4 | -6.1    | 2.3   | 4 | -5.5    | 2.3   | 4 | -1.3                           | 0.7   | 4 | -3.8    | 1.1   | 4 | -5.4    | 1.7   | 4 | 0.001              | 0.447     |
| cHCO <sub>3</sub> <sup>-</sup> | 23.1                     | 2.4   | 4 | 19.5    | 2.1   | 4 | 18.2    | 4.2   | 4 | 23.7                           | 0.6   | 4 | 21.8    | 0.6   | 4 | 20.6    | 1.1   | 4 | 0.001              | 0.265     |

**Supplementary Table S4** Blood gas analysis before (baseline) and after (at 1 and 2 h) the i.c.v. infusion of 18 mM AZE (expected ventricular concentration 500 µM) or control solution in anesthetized and ventilated rats.

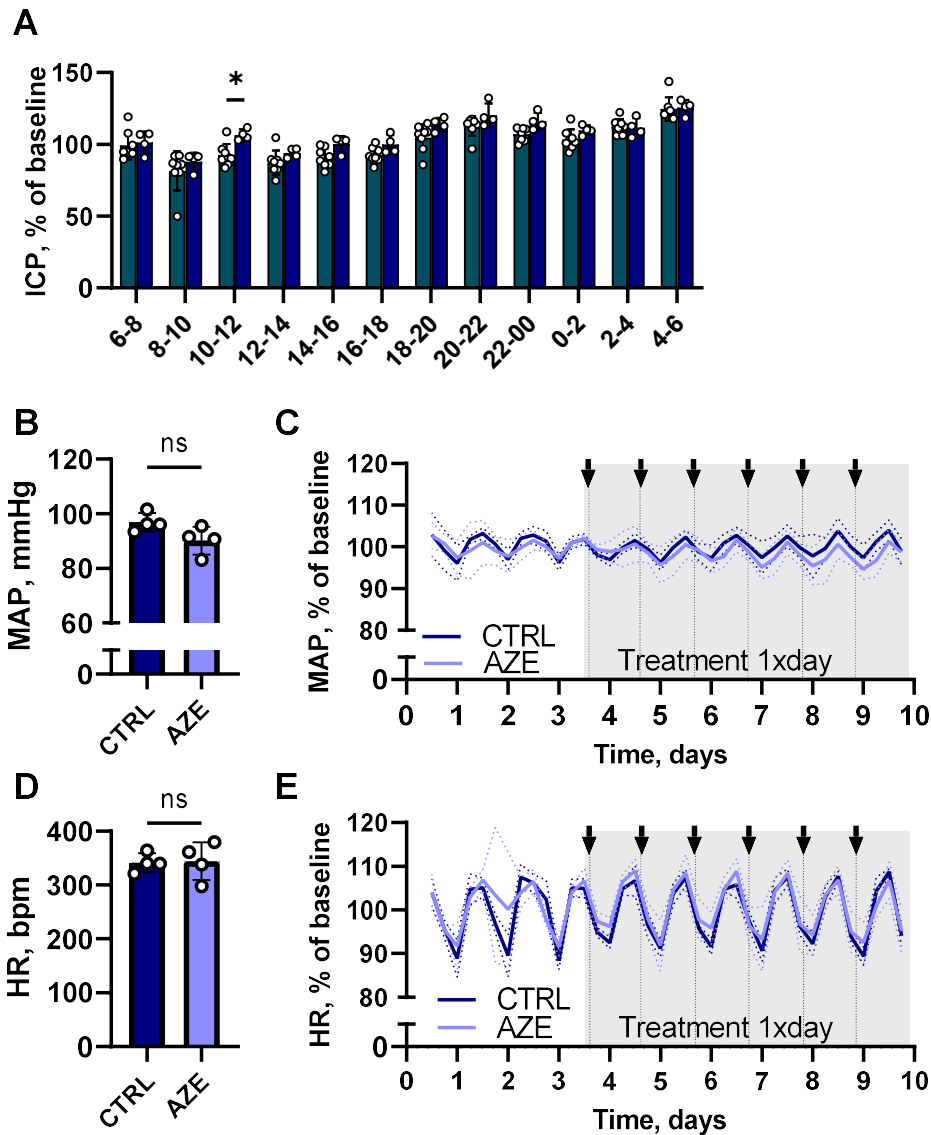

**Supplementary Figure 1 Telemetric measurements in awake rats.** Comparison between the baseline daily ICP fluctuations and p.o. saline treatment is shown in **A**. Data is presented as 2 h average ICP normalized to the average 24 h ICP before the treatment, and presented for baseline period (green, n=8) and for 1 × day p.o. saline (dark blue, n = 4). 2way ANOVA with Bonferroni's multiple comparisons test only showed significance 2h after the p.o. drug administration (P = 0.021). Figure **B** represents the 72 h average MAP, separated between the animals that afterwards received either 1 × daily 100 mg kg<sup>-1</sup> p.o. AZE treatment or control (MAP<sub>CTRL</sub> = 97 ± 3 mmHg, MAP<sub>AZE</sub> = 90 ± 5 mmHg, n = 4 in each group, P = 0.07). The daily MAP fluctuations, normalized to the 24h baseline MAP are shown as 6 h bins in **C**. The heart rate data is shown in **D** (HR<sub>CTRL</sub> = 342 ± 17 bpm, HR<sub>AZE</sub> = 344 ± 35 bpm, n = 4 in each group, P = 0.9) and **E** in the same manner as the MAP. Data are shown as mean ± SD. \*; P < 0.05, ns; not significant.
